# Supplementary material
Source: PubMed Central journal article supplement (PMC3633413)

# Supplemental Figure 1

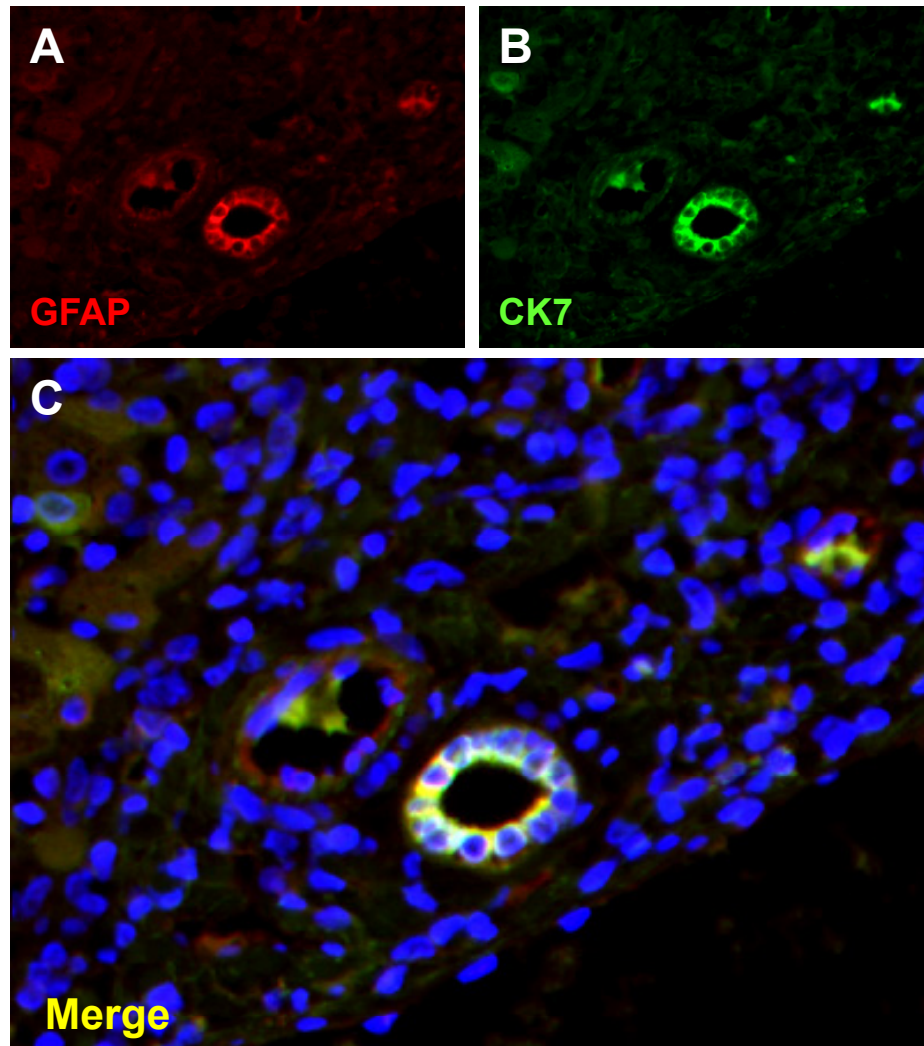

## Supplemental Figure 2

GFAP

cre

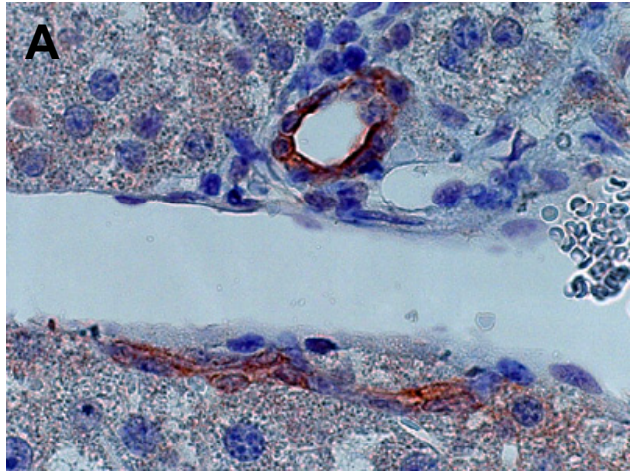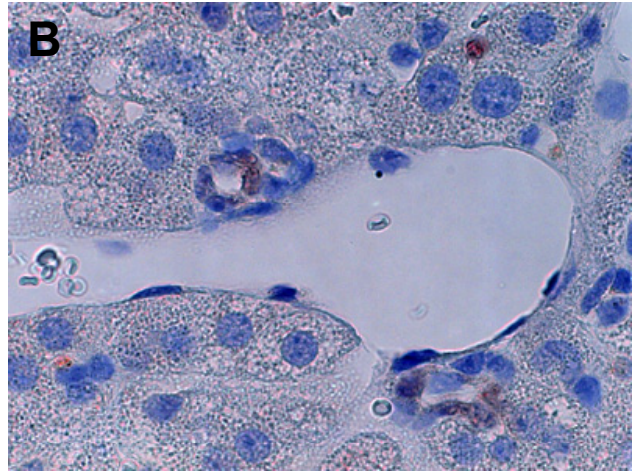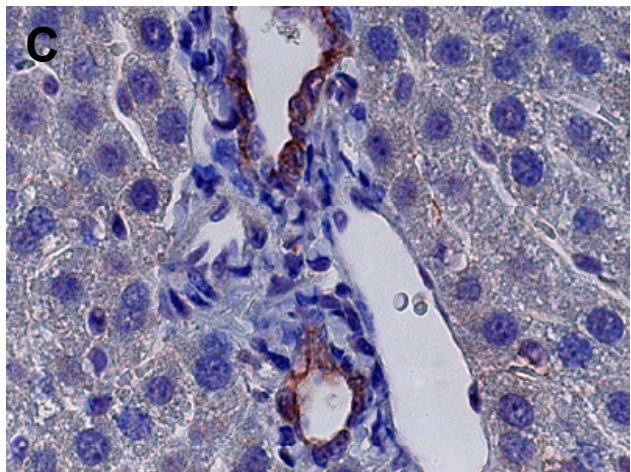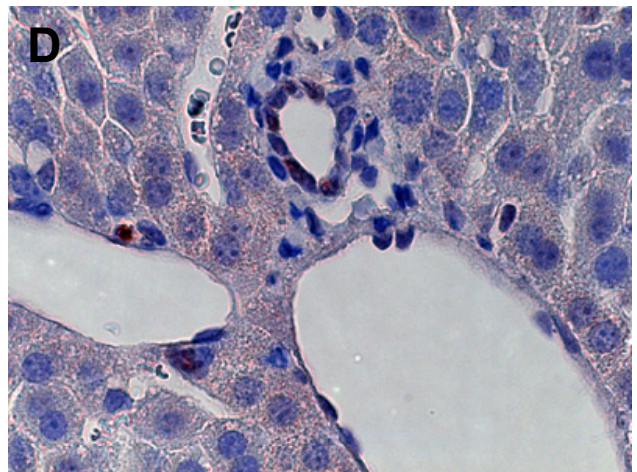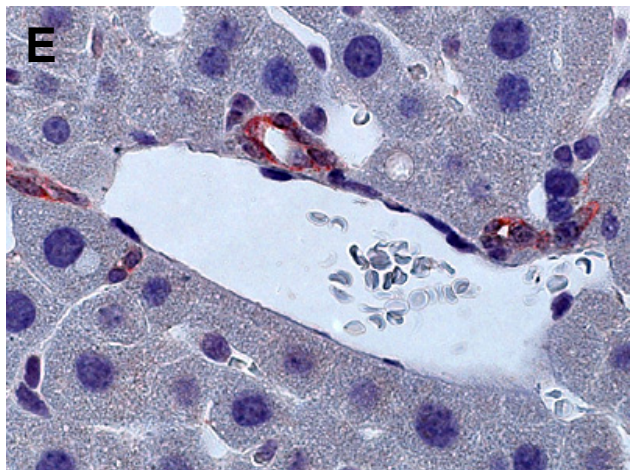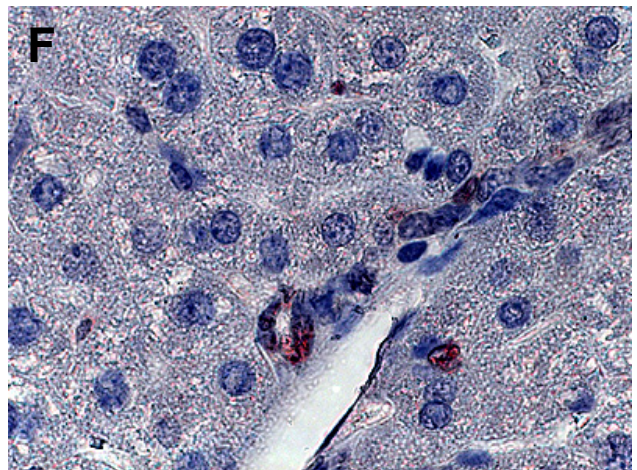

# Supplemental Figure 3

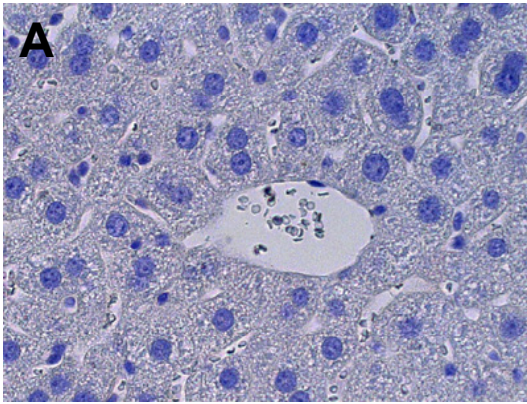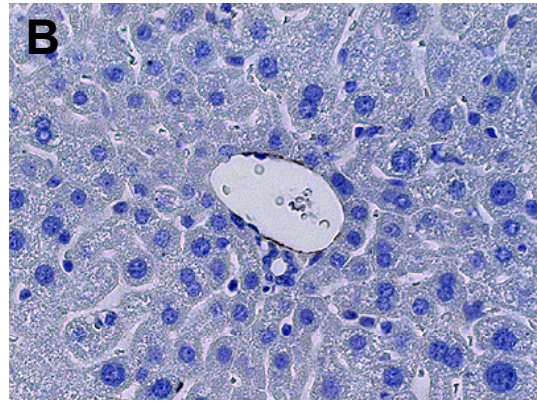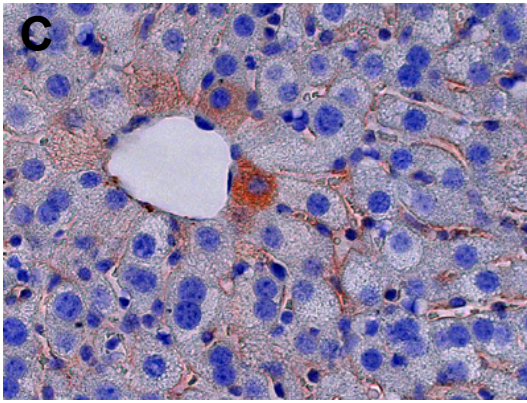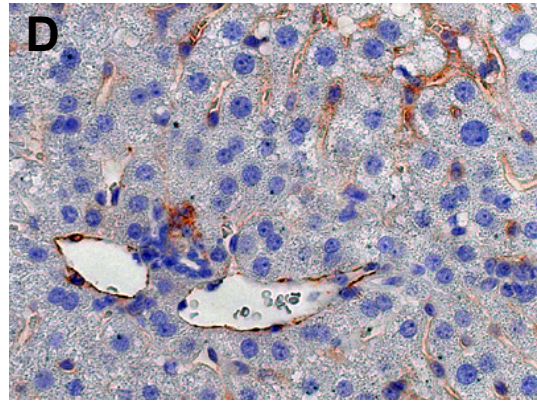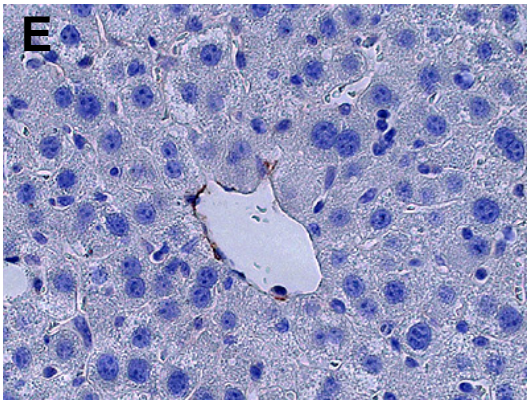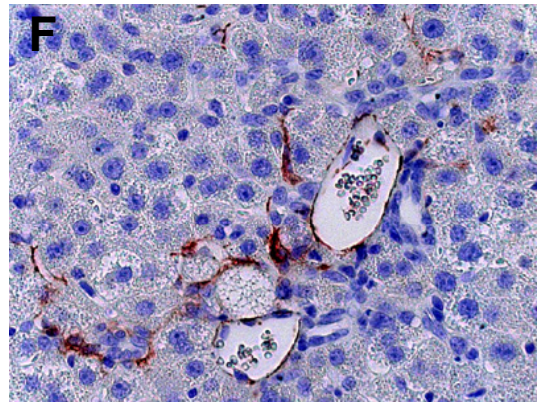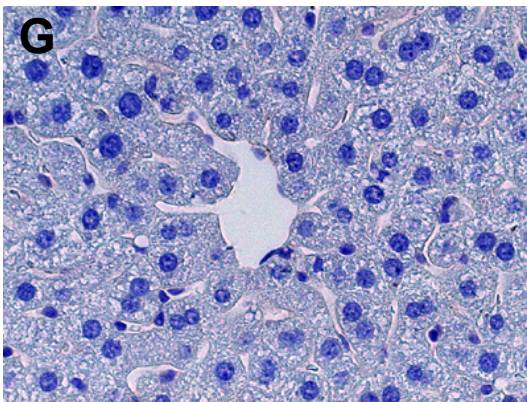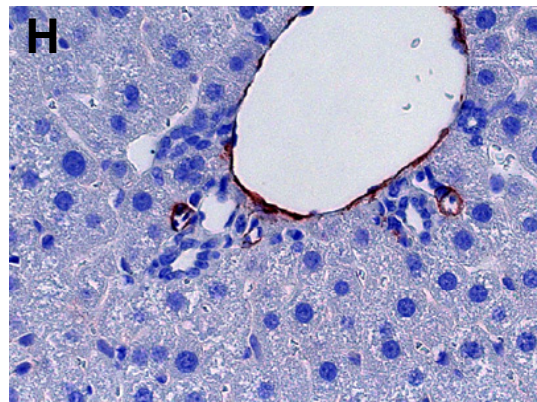

# Supplemental Figure 4

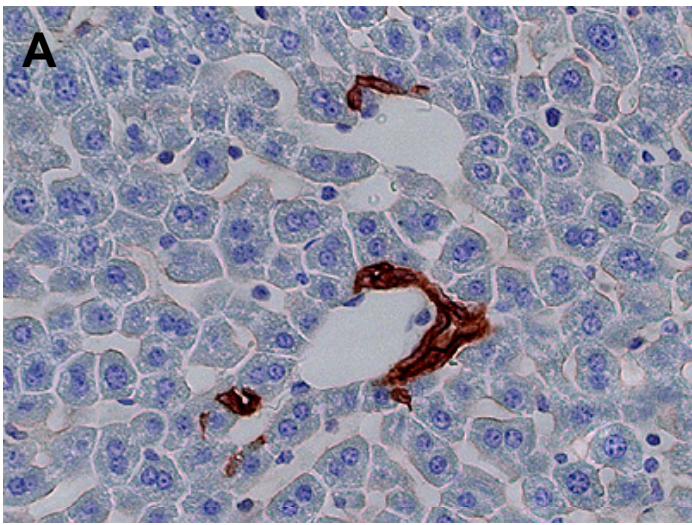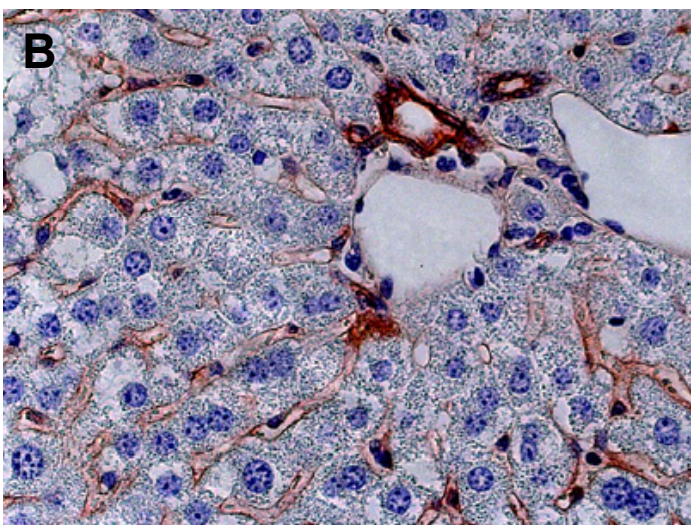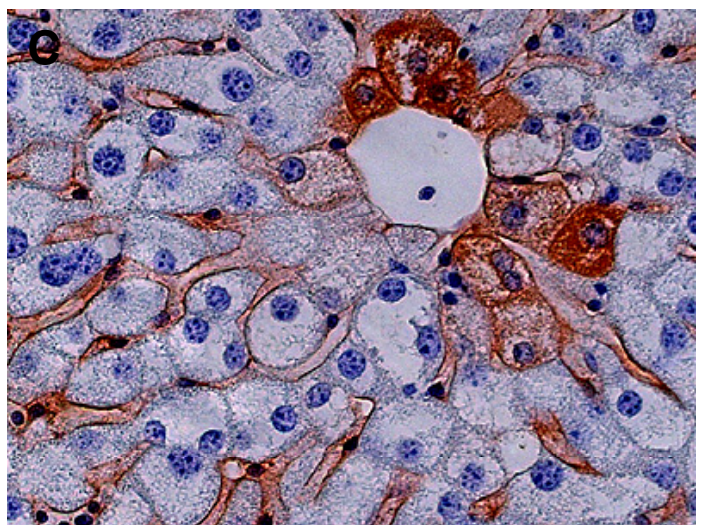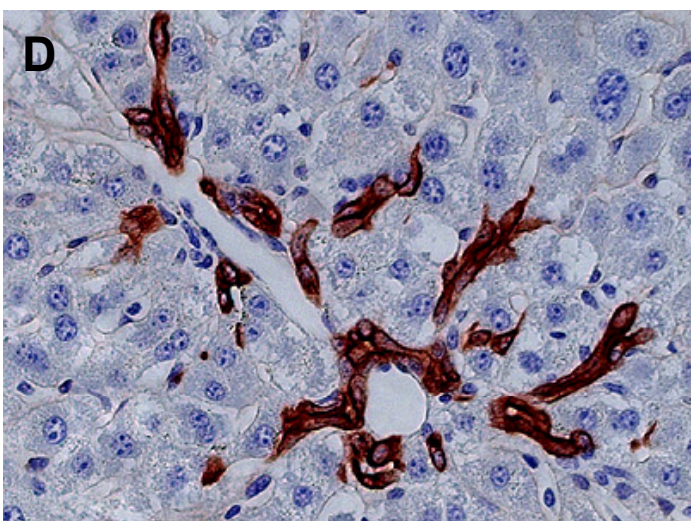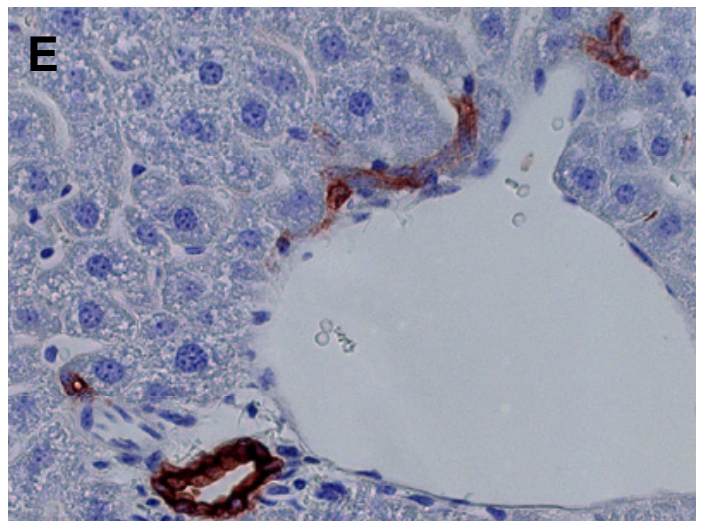

Supplement: NIHMS458807-supplement-Supplementary_Figures_1-4.pdf [file NIHMS458807-supplement-Supplementary_Figures_1-4.pdf]
